# Supplementary material for: Rapid prediction of secondary neurologic decline after traumatic brain injury: a data analytic approach
Source: PubMed Central journal article supplement (PMC9829683; doi:10.1038/s41598-022-26318-4), 2023-01-09

## **Supplemental Information**

Rapid prediction of secondary neurologic decline after traumatic brain injury: a data analytic approach

Jamie Podell, Shiming Yang, Serenity Miller, Ryan Felix, Hemantkumar Tripathi, Gunjan Parikh, Catriona Miller, Hegang Chen, Yi-Mei Kuo, Chien Yu Lin, Peter Hu, Neeraj Badjatia

**Supplemental Table 1: Heart rate variability features and their definitions**

| <b>HRV Variable</b>       | <b>Definition</b>                                                                       | <b>Unit</b>     |
|---------------------------|-----------------------------------------------------------------------------------------|-----------------|
| <b>Time domain</b>        |                                                                                         |                 |
| <b>Mean NN</b>            | Mean NN intervals                                                                       | ms              |
| <b>SDNN</b>               | Standard deviation of NN intervals                                                      | ms              |
| <b>RMSSD</b>              | Root mean square of the sum of the squares of differences between adjacent NN intervals | ms              |
| <b>SDNN index</b>         | mean of the SDNN values of each 5-minute segment                                        | ms              |
| <b>pNN50</b>              | Percentage of NN intervals that differences between adjacent NN intervals > 50ms        | %               |
| <b>pNN20</b>              | Percentage of NN intervals that differences between adjacent NN intervals > 20ms        | %               |
| <b>Frequency domain</b>   |                                                                                         |                 |
| <b>Total power</b>        | Spectral power of NN intervals 0-0.4Hz                                                  | ms <sup>2</sup> |
| <b>UVLF</b>               | Spectral power of NN intervals 0 – 0.003Hz                                              | ms <sup>2</sup> |
| <b>VLF</b>                | Spectral power of NN intervals 0.003-0.04Hz                                             | ms <sup>2</sup> |
| <b>LF</b>                 | Spectral power of NN intervals 0.04-0.15Hz                                              | ms <sup>2</sup> |
| <b>HF</b>                 | Spectral power of NN intervals 0.15-0.4Hz                                               | ms <sup>2</sup> |
| <b>LF/HF</b>              | Ratio of LF to HF power                                                                 |                 |
| <b>Nonlinear dynamics</b> |                                                                                         |                 |
| <b>SD1</b>                | Standard deviation of the Poincare plot (PP) perpendicular to the line of identity      | ms              |
| <b>SD2</b>                | SD of the PP along the line of identity                                                 | ms              |
| <b>SD2/SD1</b>            | Ratio of SD2 to SD1                                                                     |                 |
| <b>Alpha1</b>             | Short term fluctuation slope in detrended fluctuation analysis                          |                 |
| <b>Alpha2</b>             | Long term fluctuation slope in detrended fluctuation analysis                           |                 |
| <b>Ellipse area</b>       | Area of the ellipse fit of PP                                                           |                 |

Heart rate variability (HRV) features were calculated both from electrocardiography (ECG) and photoplethysmography (PPG) waveforms and were calculated using three different methods, including Welch, Lomb, and autoregressive (AR).

**Supplemental Table 2:** Initial head computed tomography (CT) features of all included patients, n=905

|                                             |                |                   |
|---------------------------------------------|----------------|-------------------|
| <b>Time to CT (hours)</b>                   |                | 0.85 [0.52, 1.25] |
| <b>Abnormal CT</b>                          |                | 388 (42.8%)       |
| <b>Rotterdam Score</b>                      |                | 2 [2, 3]          |
| Basal Cisterns                              | 0 [normal]     | 720 (90.4%)       |
|                                             | 1 [compressed] | 46 (5.8%)         |
|                                             | 2 [absent]     | 30 (3.8%)         |
| Midline Shift                               | 0 [< 5mm]      | 737 (92.6%)       |
|                                             | 1 [≥5mm]       | 59 (7.4%)         |
| Intraventricular or Subarachnoid Hemorrhage | 0 [absent]     | 516 (64.8%)       |
|                                             | 1 [present]    | 280 (35.2%)       |
| Epidural Hematoma                           | 1 [absent]     | 762 (95.7%)       |
|                                             | 0 [present]    | 34 (4.3%)         |

Values are reported as either median (1<sup>st</sup> quartile, 3<sup>rd</sup> quartile) or as the number (percent of total)

**Supplemental Figure 1:** Receiver operating characteristic curve exploring neurologic decline model's ability to predict in-hospital mortality

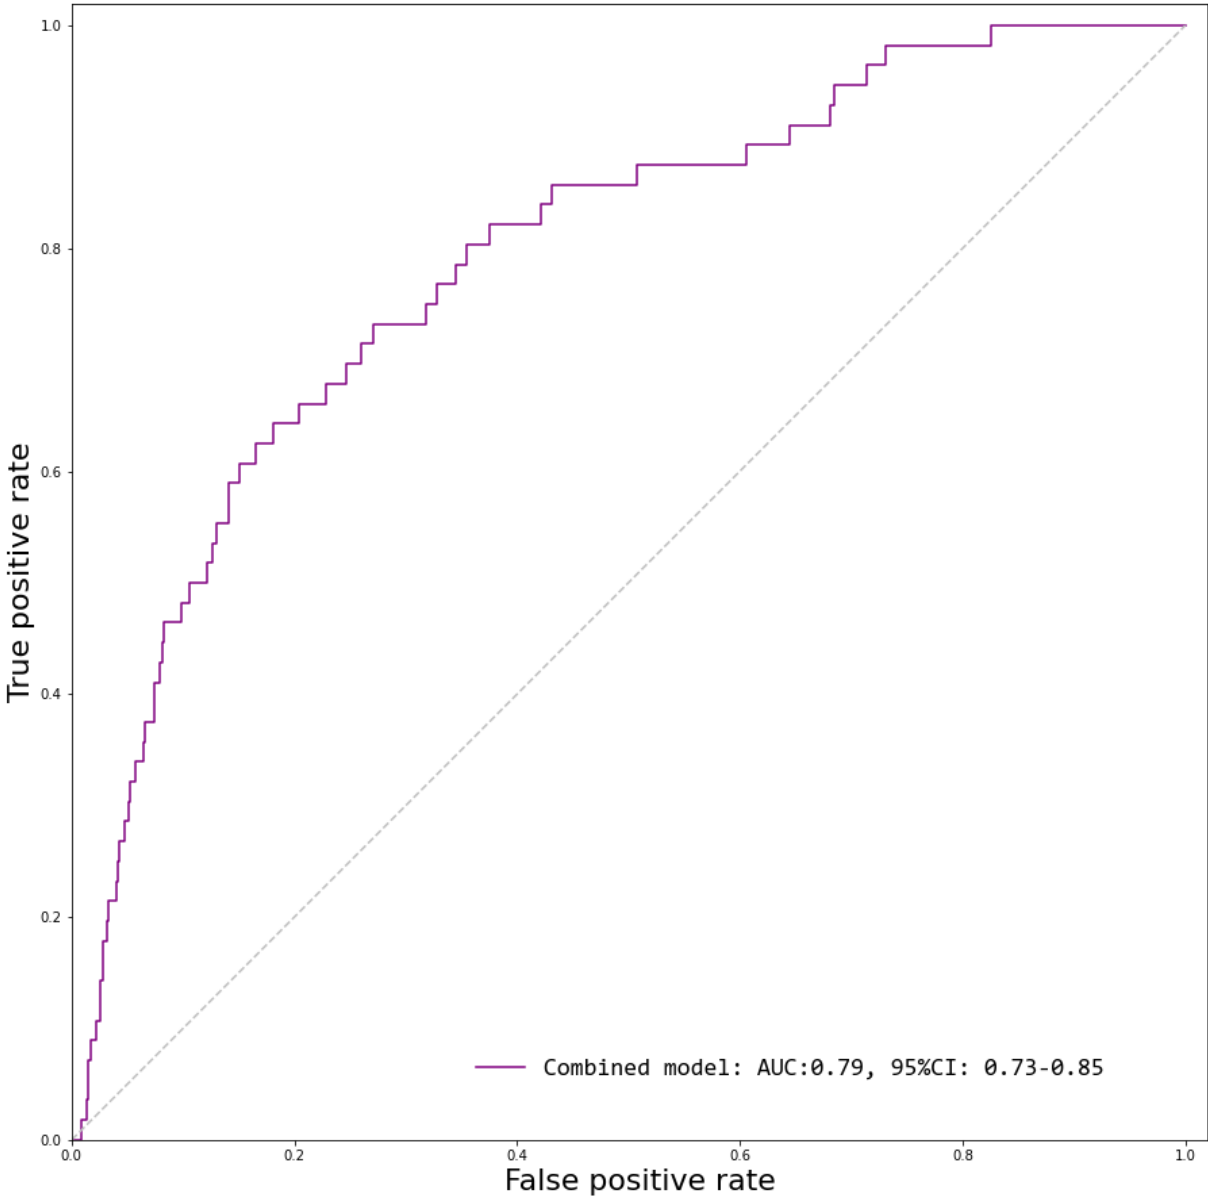

Supplement: 41598_2022_26318_MOESM1_ESM.pdf [file 41598_2022_26318_MOESM1_ESM.pdf]
